# Supplementary material for: Investigation of Stress Situation of Pediatric Nurses and Corresponding Changes of Intestinal Flora
Source: Research Square preprint supplement (doi:10.21203/rs.3.rs-154491/v1), 2021-01-29
Supplement: Supplementary file 1 [file 8e9c57b418b981bfee760f97.docx]

Job Stresses Scale

[1]Age [single choice] *

Under the age of 20

20 to 29

30 ~ 39

40 to 49

Over 50

[2]Educational background [single choice] *

Undergraduates

Bachelor’s degree

Master’s degree or above

[3]Years of working [single choice] *

1 ~ 2 years

3 ~ 5 years

6 ~ 10 years

Over 10 years

[4]Married or not [multiple choice] *

Yes

No (Please skip to Question 6)

[5]Number of children [single choice] *

0

1

Over 2

| Statements | No pressure | Relatively low | Relatively high | Condense pressure |
| --- | --- | --- | --- | --- |
| 0 | 1 | 2 | 3 |
| Low social status |  |  |  |  |
| Too few opportunities for further study |  |  |  |  |
| Low wages and other benefits |  |  |  |  |
| Too few opportunities for promotion |  |  |  |  |
| Frequent shifts |  |  |  |  |
| Less independence but demanding |  |  |  |  |
| Poor distribution of work |  |  |  |  |
| Heavy workload |  |  |  |  |
| Shortage of nurses |  |  |  |  |
| No time for patients’ psychological care |  |  |  |  |
| Too much non-nursing work |  |  |  |  |
| Too much useless paper work |  |  |  |  |
| Poor working environment |  |  |  |  |
| Insufficient facilities |  |  |  |  |
| Large numbers of patients |  |  |  |  |
| Errors and accidents during nursing |  |  |  |  |
| Complained by patients and their families |  |  |  |  |
| Taking care of a dying patient |  |  |  |  |
| Rude actions of patients’ families |  |  |  |  |
| A high-demanding patient |  |  |  |  |
| An impolite patient |  |  |  |  |
| Patients refuses to cooperate |  |  |  |  |
| Fail to meet psychological needs of patient |  |  |  |  |
| Fail to conduct patient education |  |  |  |  |
| Worry about causing pain to the patient |  |  |  |  |
| Sudden death of the patient |  |  |  |  |
| Too much criticism from managers |  |  |  |  |
| Doctors’ complains |  |  |  |  |
| Lack of understanding and respect from other medical workers |  |  |  |  |
| Lack of understanding and support from managers |  |  |  |  |
| Lack of understanding and support among colleagues |  |  |  |  |
| Conflicts with managers |  |  |  |  |
| Conflicts with doctors |  |  |  |  |
| Hard to work with some others in the ward |  |  |  |  |
| Lack of amity and cooperation among colleagues |  |  |  |  |
